# Supplementary material for: CD73 is associated with poor prognosis in HNSCC
Source: PubMed Central journal article supplement (PMC5308683; doi:10.18632/oncotarget.11435), 2016-08-20
Supplement: oncotarget-07-61690-s001.pdf [file oncotarget-07-61690-s001.pdf]

## CD73 is associated with poor prognosis in HNSCC

### Supplementary Materials

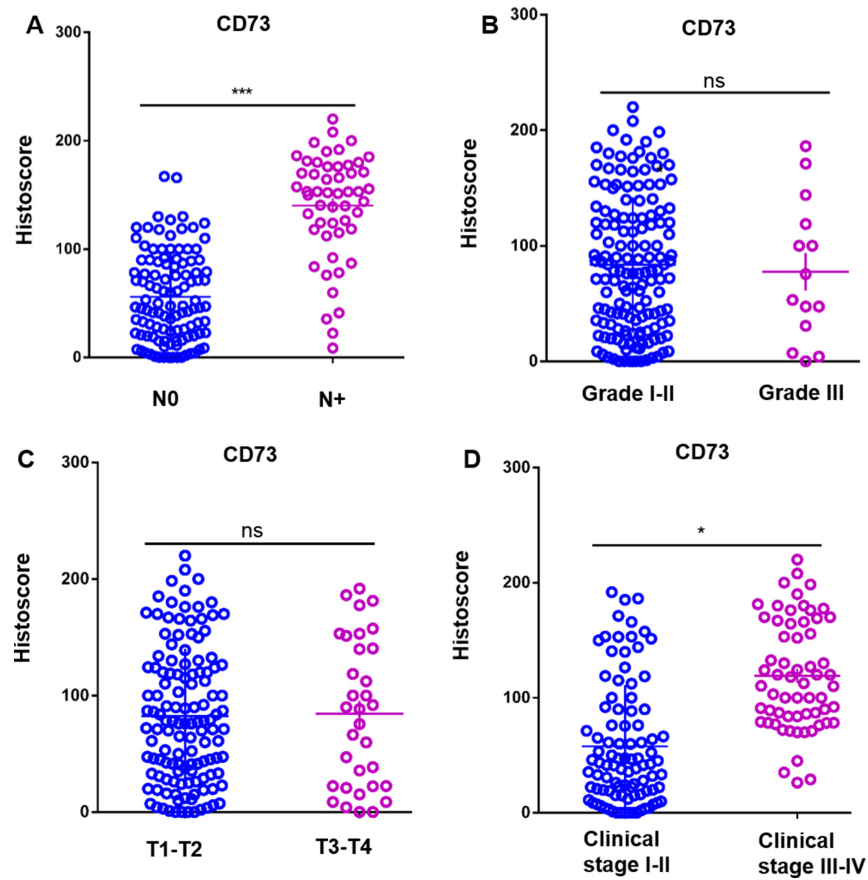

**Supplementary Figure S1: CD73 expression was correlated with lymph node metastasis and clinical stages in HNSCC.** (A) CD73 expression correlates with lymph node metastasis in HNSCC; (B) CD73 expression was not specifically associated with different pathological grades of HNSCC; (C) CD73 expression did not correlate with T category of HNSCC; (D) CD73 expression correlated with clinical stages of HNSCC (Mean  $\pm$  SEM; \* $P < 0.05$ , \*\*\* $P < 0.001$ ,  $t$ -test).

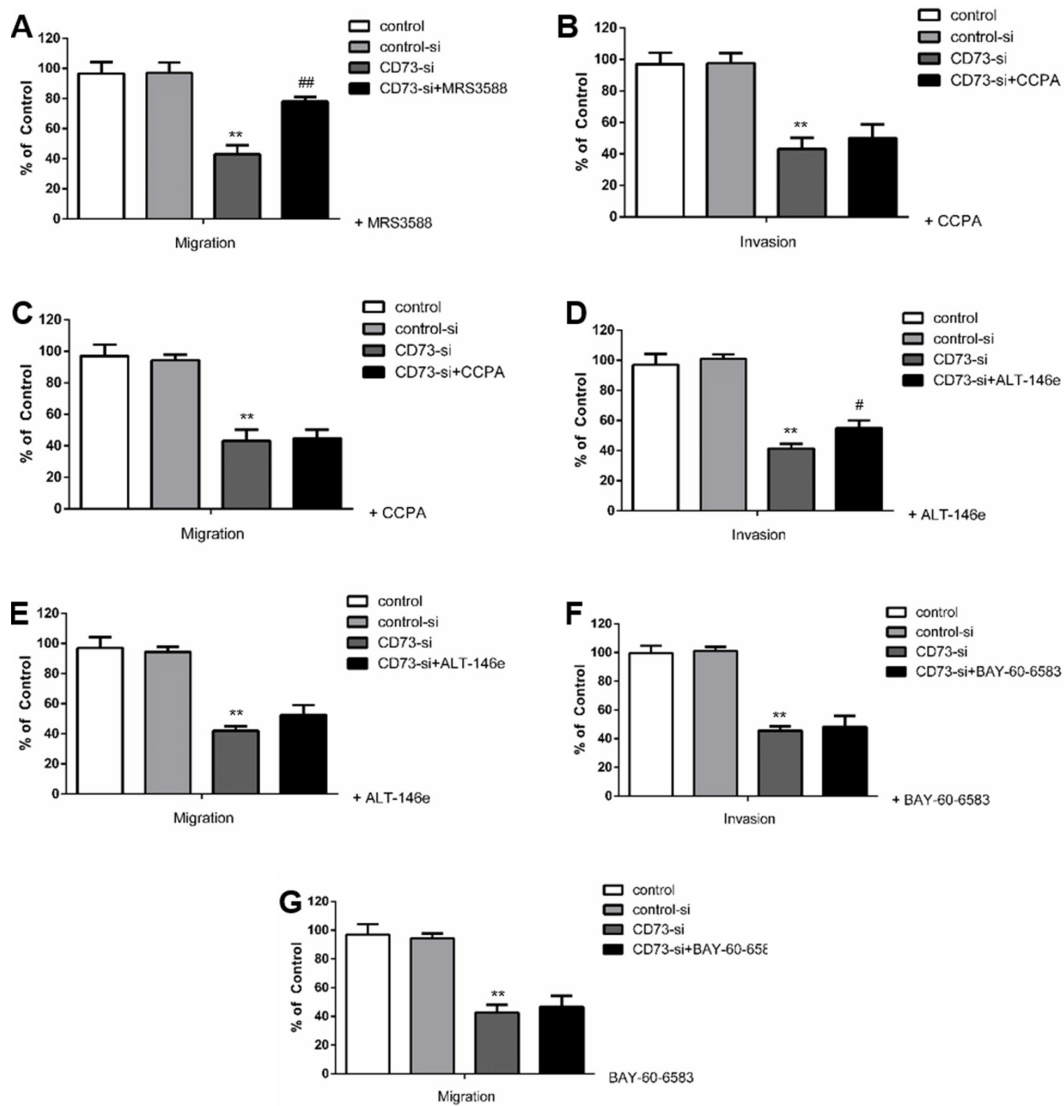

**Supplementary Figure S2: The migration abilities of CAL27 would reversal after using MRS3588.** (A) Cell migration increased significantly following treatment with MRS3588, specific  $A_3$ R agonist; (B–C) Cell migration and invasion did not change following CCPA (2-chloro-N(6)-cyclopentyladenosine), specific  $A_1$ R agonist, treatment; (D) Cell invasion increased significantly following ALT-146e, specific  $A_{2A}$ R agonist treatment; (E) Cell migration did not change when adding ALT-146e, specific  $A_{2A}$ R agonist; (F–G) Cell migration and invasion did not change when adding BAY-60-6583, specific  $A_{2B}$ R agonist. Quantification of cell numbers with Image J “cell counter” module (Mean  $\pm$  SEM; \*\* $P < 0.01$ , versus control-si group, # $P < 0.05$ , ## $P < 0.01$ , versus the CD73-si group, student  $t$ -test with GraphPad Prism5.0).

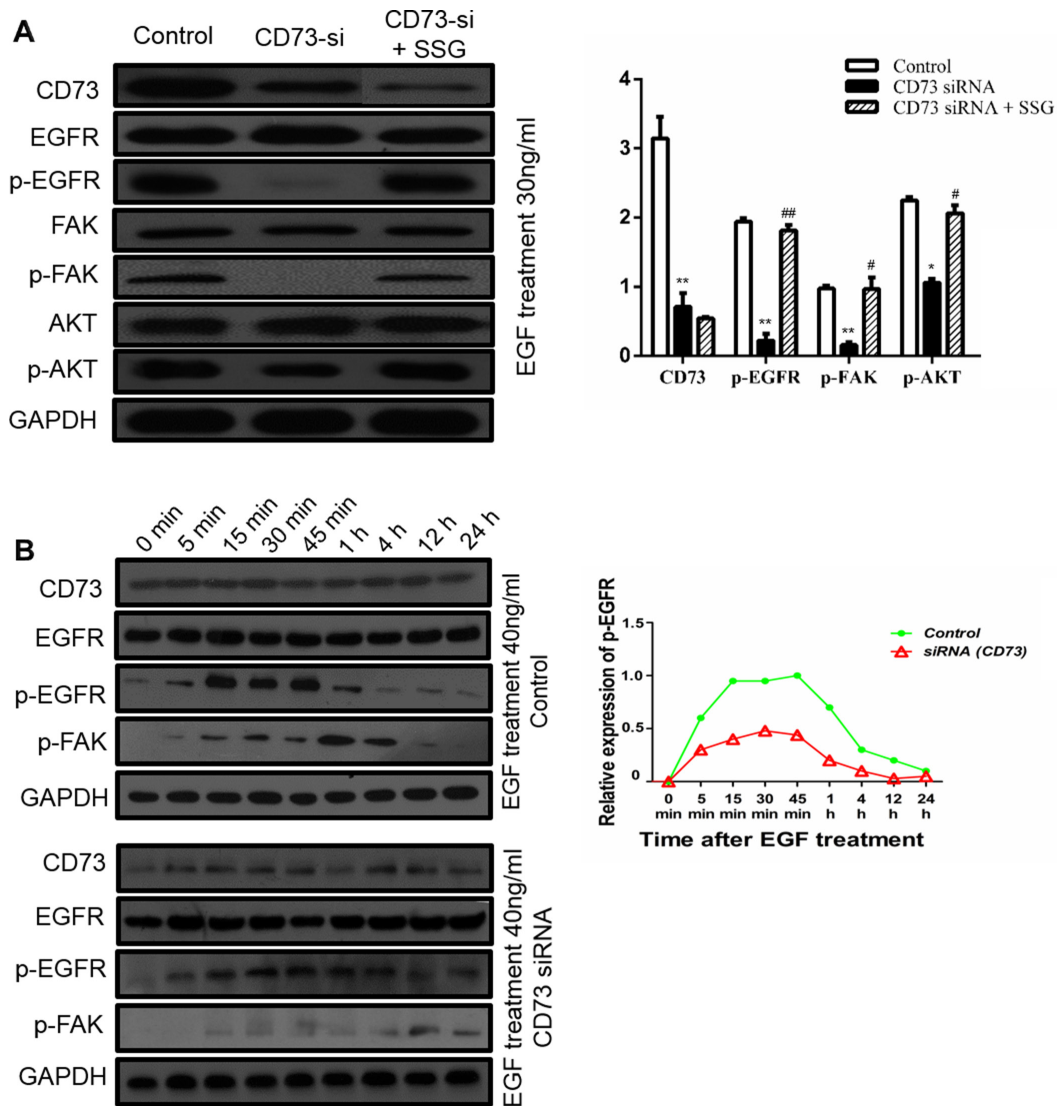

**Supplementary Figure S3: CD73 activated EGFR/ FAK/ AKT pathways.** (A) p-EGFR, p-FAK, p-AKT levels were determined following siRNA-suppression of CD73 in CAL27 cells. GAPDH was the internal standard for protein loading. The values are presented as the means  $\pm$  SEM. One-way ANOVA with post-Dunnnett analysis was performed using GraphPad Prism5. \* $P < 0.05$ , \*\* $P < 0.01$ , versus the control group, # $P < 0.05$ , ## $P < 0.011$ , versus the CD73-si group, ( $n = 3$ ); (B) Western blot examined the time-dependent phosphorylation of EGFR and PAK after EGF treatment in both CAL27 control-si and CAL27 CD73-si groups, and graphed by Quantitative analysis.

### Supplementary Table S1: Primer sequence

| Gene  | Primer  | Sequence (5' to 3')  |
|-------|---------|----------------------|
| CD73  | Forward | GCCTGGGAGCTTACGATTTG |
|       | Reverse | TAGTGCCCTGGTACTGGTCG |
| GAPDH | Forward | AGAAGGCTGGGGCTCATTG  |
|       | Reverse | AGGGGCCATCCACAGTCTTC |
